# Supplementary material for: Simple Sequence Repeat Markers Reveal Genetic Diversity and Population Structure of Bolivian Wild and Cultivated Tomatoes (Solanum lycopersicum L.)
Source: Genes (Basel). 2022 Aug 23;13(9):1505. doi: 10.3390/genes13091505 (PMC9498693; doi:10.3390/genes13091505)
Supplement: Supplementary file 1 [file genes-13-01505-s001.zip › Supp fig and table 2022 08 11/Supplementary Table S1.xlsx]

## Sheet: Table S1
	Table S1. Simple sequences repeat microsatellites (SSRs) developed in the present study.
No.	Chromosome	Locus Name	Polymorphism	Expected product size	Start-end position of the product	Position of reference sequence in the chromsome	Position of the SSR in the reference sequence	Reference sequence length	Reference sequence
1	1	TomSatX1-1	monomorphic	278	268-545	6787129_6787752	301-324	624	AGGGGGACATACAATGGTAGAGTCTATTGTCTATACTCTTGAAACGATGTAAGACGACTTCCGTCAGGTTTACAAGGTATTGAATCTTCACGTCAAGCCGAGGCACTTGACGGTGTTTAGATTGCTTCTATGTCGGCTCAAATAACATAGCTAACATTGGCACTAGCAGGGTCGGAGCAAAGAAGAGTAGCTGAACAAAAAAGCATGAATGCGACCGTTCAGCAAATCAAACAACAATTATTAAACCTCACTCATCAACCTACTACATCTTCGGCTCTCGAGGACACCGACGACGACAGTGAGGAGGAGGAGGAGGAGGAGGAGGATTTTGTTGATCACATTCCCTAGTTTGGGTCTCTTTTATGAACTTTTGAAATGCATTTTCAATGGCTTTATATG…
2	2	TomSatX2-2	Polymorphic	254	373_626	5591772_5592598	401-427	827	ACATCAATCTCAAAGCAATTCATAATGTAACTTATTTATCCAATGAGAATACACATAAACCTATATATTCTCCTTTCATATTTTAAAAGTCATTTTCCTCAGTTTCATCTTAGAAACATGGGTTAAGAATGGGTACATCGAAATTTTTCATGAAAAGCATAGATACTCCCAATTCATGCATAAACAGTCATAGTCCAATCAATTCAAAAAACAATCATAAAGACCAACAACTTACAAGAAAACCTAACTCGAATTTGAGAATTTCCACTTTTCAATAATGGATGTTAGGGTATCTATGTATGCAAGGATTACATGGATGAATAAAACTATCATACCTTTCTATCAAATACCACAAAAAATTGGAGAATGGATACTTGAACCTTAAGCCCTAGCATGAAC…
3	3	TomSatX3-1	monomorphic	233	365_597	650620_651437	401-418	818	TAAATATACGTGATCTTATTTTTGTAATAAAATGTGGATATAATATTCATCACTGCAATCTATATCTTTCTTCTATGCATTTCTTGTCAAAGCCAGTAATAGTTTATACATCTCACAACTCAAGTTTTTTTTTTTCGATAACAGCTACTGTGGATTTCTGTTACTATATGTTGTTTCTTATACCTTGACTGTTGCATTGTTTTGTTGTGGTTTTCATTCTGTTGTTTGTTATTATCTGATGTTTTTGTACTTCGATTACTTTTTTCTCTTGACTTCTTCCGGACTTTTTTTACTTGAGTCGAGGGTCTATCGAAAAAAACCACTCTATCTTTGAGGTAGGAGTAAGGTTTGTGTATACTCTACCCTTTCCGGACCCCACTTTGTGGGACTATATTGGGT…
4	4	TomSatX4-1	??	196	450_645	610756_611576	401-421	821	ATTTAAATCAATCTGAAATAATTAGCTCTATACAGTCTTATTTGATACATACTATTAATTAAGCTAGAAAATAACATCTAAGAAACTAAGATACAATCATCCAAACTAATATCAACTTCTATATCATGCGAACTTTTTATTTTTTTCATCGTAGCCACCATTGATAACGATCTCTTGATATTCTTGAGAAGAAATCAAACAAGATAACTTCTTCATGAACATCAAAGAAAAGATTATTTTTAATAGATGACTTATTAATATTATTTCTACACAATGGACAAGTCATGTGTCCATAACCAAACCATCTATCAAGACAAACTCTATGAAAAAGATGATTGCACCTCAAATTTCTTACTTGTTCTCCTTCTTCTATTTCACATAAACAAACCGCACATTCTA…
5	6	TomSatX6-1	Monomorphic	142	319_460	525383_526200	401-418	818	ATGTAGTACATCCAATATTATCGCAATAAATCATTATCACCCGTCATTACTATTAATTACTACTTATATATCGTCAATCACCATCATCATTAACCATTGCTCTTCATCCACCATAGTTATTGTCTTTCAAGCATTACCATCATTCATCATCATTATTAACTACTTATATATCATCAATAACGATTTATCATTCATCACAATTATTATTTATCAACATCACCTATCGCTCTTGATCATTACTATTAATCATCATTAACCTTTAACTGCAACTTACACTATTGTTCTTAATCGATATTCACAATCACCATAGTTAGTCATCACCATGAGTCCTAGCCACAAATTCAAAGCAAAACACCCTTAAAGCCTGGTAGTGTGTGTGAATTAAAGACCAGCAGTCCA…
6	7	TomSatX7-1	Polymorphic	238	419_656	2829121_2830156	501-536	1036	GTAAATTTTTAAATTTTAAAAAGCCCAACTAAGCAGGCCCATTAAAAAAACCGAAATAACAAAACCGAATCAAAATAATATAAATTGAACCGAAATAATAAAAACCGAATTGAACTGTATTATTTTGGTTCGATGGTCGGTACACGTTGTACAAGAACCGAAAACCAAAAAATCGAAAAGAATCAAAACCGAATCGAATTACCGAATGCCCACCTTCCTTCTGAATTTTATTTTTGAAAGATTTAAACAGTAAGTCTTGAAAGAAATTATGTTTGAATAATTGTAGATTCTTTTATTTTATTTTTTAAAAAAAATATTCCATAGACAAAAAGAAATAGACATGTAACAAACTATGACATTGAGAATTAAATAAACCGAAAAAAATATTTGTTCACCTAC…
7	7	TomSatX7-2	Polymorphic	217	290_506	6318835_6319762	451-478	928	ATGATTTGAATGAAATTGGTGTGTGGGTGAAGTAACCCAACACAAAAATAGCCCACATACCTAGTTGGGGATCACCCCAATGAAAATCCACGAATCTAAACTTGGTGTTCTTGCGTCTTCTTCTTCCTTCTCCTCTTTTCTTATTGCTTTCAAAATCCTAGTCTATTTTTCTAAGTGTGTGAACTGAATGGGATCACTTTTTACACCAACATATTACTCCAAAAAGAAATAAGTTGGCTTAAGGAAAAGACCAAAACACCCTTACTAAATCCAGTTTTGGAACTTTCTCTGCTCAACAATCCATCTTCCGAATGTCATGTATCACTCATACGACCTCGGAAATTCACAAACTTAGTGTCGTTGGAACAAGGTCAATGCAACAATTGAAAAGTCATAAGA…
8	8	TomSatX8-1	Polymorphic	221	366_586	37417603_37418656	501-554	1054	CAAGTAATACCAAACATAAAATATTTAATTGCATATATAAATAAGTATAACCAAAATCTCAATAGCAACAACATATTAGCAAATATTTCAATTCAAAAACTAAATATAGATAGTAGATGCAAAAGTTTTGAACCTGAATGACTCAATAGTCAATAAGATAAGCGATAGTATAAGTCTAATCTTCTTTAAGATTTTCGAATCTTTAAGTCCAAGATTCTCTGCATTATATTGTTTCTCATCTTCGTCCTCTATACTATAATTCAAACCTATGTCTTTCTTTTTGTTCACTCCTTTTTTCTACCATCAGCTAATGGCATTGAATATTACTATTTGTAGGCAAAAAAATTAAATGTATTAATTATTATACACCTAAACTGAATTGGGCTGAAGATTAAAATG…
9	9	TomSatX9-2a	Polymorphic	244	430_673	6798862_6799883	501-522	1022	AGAAGTATTTTCGACTTTTAGGAGTCGCCACTTAATTTTTAAGAAAAATTAAGAAAACTCATTCTCAAAACAATTTAAACAGAAAAAATCATTTTGAAAATATTTTAGGGGGTTCGGGATTCTTATTAGTGTCTTAGGAAGGTGAAAGGCACCTAAGACACTCCGCTAACTTACGGTTTTCCAACGATTAACTTATTTGACTATTTTGTTTTAACTTTTGCGAATCTTTTGTTATTAAACTTATTAGACATTTACTTAGGCAAATTTTCAAGGTTGGAAATATTCATAGTTTATTTTGCAACTTTTGTGAAGTTATTCCGAAACTCAATTTCCTTGAAGTTTTATCTAAACAAACTTTATGAATTTTGAAATATTATCGCTTCTAAGCTTGATTTTAAA…
10	9	TomSatX9-2b	Polymorphic	320	309_628	6782639_6783654	501-512	1016	AGAAGTATTTTCGACTTTTAGGAGTCGCCACTTAATTTTTAAGAAAAATTAAGAAAACTCATTCTCAAAACAATTTAAACAGAAAAAATCGTTTTGAAAATATTTTAGGGGGTTCGGGATTCTTATTAGTGTCTTAGGAAGGTGTAAGGCACCTAAGACACTCCGCTAACTTACGGTTTTCCAACGATTAACTTATTTGACTATTTTATTTTAACTTTTGCGAATCTTTTGTTATTAAACTTATTAGACATTTACTTAGGCAAATTTTCAAGGTTGGAAATATTCATAGTTTATTTTGCAACTTTTGTGAAGCTATTCCGAAACTCAACTTCCTTGAATTTTTATCTAAACAAACTTTATGAATTTTGAAATATTATCGCTTCTAAGCTTGATTTTAAA…
11	10	TomSatX10-1	Polymorphic	276	377_652	22830556_22831603	501-548	1048	GTCTAAAAAGACATTCTTTCTTCCTTATTCTCCAAGTCATTTGTTGTAAACCCTATGTGGCAATATGTACTTGTATAAGGTTTATGCCCAAATATTGCCTTCATTTAGATGATTCAAAATGAGACTGTATTATTAGACTAACTCTTTATATGTTACTTATGTTAACTAAACGAGAAGCCTATGTAAGCTTCCTATGTGAAGAGTCTAAGTAACCTTCATATGTATATATTTAAAGTGAGTGAGAGGTCTATGTATAGCTCTATATGTATAAGGTTTCAATATTTTTCACATTTTGACCTAATGTATGTAGTGATGAATGCTAAGAGGCTAGTATTCGTCCTCTTCGAAAAGACGACGCCGGTTGCGTCTATGAGGTTCTCCCGGTTGTAACACTCCTTA…
12	11	TomSatX11-1	Polymorphic	218	406_623	281241_282294	501-554	1054	GCCCCGTAGCATCTCGAGTGTATTAGATACAAACGAAGGAGGTACTTCAAAAACATAGAGTTGATTTATATTCATACTAGTTTGAATTTTTCGATTTCCTTCTATACTCTGCTGAGTGAGTCGATTTCATTCGTAATTGCTTAATATTATTTCTTTATCATAGGACGATTATATCTATTTATTTAATTTTATATAAATTTATAAGTGTATTTATTTATATCTAAAAATTAAAGGACATAAATACTGAAGTACGCATTATTATGCTTAAAAGATAATAGTATTTTATATAAATTTATAAGTGTATTTATTTATATCTAAAAATTAAAGGACATAAATACTGAAGTACGCATTATTATGCTTAAAAGATAATAGTATGATAGTTTTACACATTTATAAATT…
Note: Chromosome position is for Solanum lycopersicum cultivar Heinz 1706, SL3.0
Note: The SSR of TomSat9-2a and TomSat-2b are located 16222 bp apart on chromosome-9
