# Supplementary material for: Simple Sequence Repeat Markers Reveal Genetic Diversity and Population Structure of Bolivian Wild and Cultivated Tomatoes (Solanum lycopersicum L.)
Source: Genes (Basel). 2022 Aug 23;13(9):1505. doi: 10.3390/genes13091505 (PMC9498693; doi:10.3390/genes13091505)
Supplement: Supplementary file 1 [file genes-13-01505-s001.zip › Supp fig and table 2022 08 11/Supplementary Table S2.xlsx]

## Sheet: Table S2
	Table S2. Final selection of simple sequences repeat microsatellites (SSRs) for the present study
No.	Locus Name	Polymorphism	Repeat Motif	Forward Primer	Reverse Primer	SSRs Position in the Reference Sequence	Reference sequences
1	TomSatX1-1	Monomorphic	(GAG)8	TCTTCGGCTCTCGAGGACA	AGTTCTGATGCCCACATGCA	301-324	AGGGGGACATACAATGGTAGAGTCTATTGTCTATACTCTTGAAACGATGTAAGACGACTTCCGTCAGGTTTACAAGGTATTGAATCTTCACGTCAAGCCGAGGCACTTGACGGTGTTTAGATTGCTTCTATGTCGGCTCAAATAACATAGCTAACATTGGCACTAGCAGGGTCGGAGCAAAGAAGAGTAGCTGAACAAAAAAGCATGAATGCGACCGTTCAGCAAATCAAACAACAATTATTAAACCTCACTCATCAACCTACTACATCTTCGGCTCTCGAGGACACCGACGACGACAGTGAGGAGGAGGAGGAGGAGGAGGAGGATTTTGTTGATCACATTCCCTAGTTTGGGTCTCTTTTATGAACTTTTGAAATGCATTTTCAATGGCTTTATATG…
2	TomSatX2-2	Polymorphic	(CTT)9	ACTTGAACCTTAAGCCCTAGCA	GGGTGCAACAGTTTTCGGTC	401-427	ACATCAATCTCAAAGCAATTCATAATGTAACTTATTTATCCAATGAGAATACACATAAACCTATATATTCTCCTTTCATATTTTAAAAGTCATTTTCCTCAGTTTCATCTTAGAAACATGGGTTAAGAATGGGTACATCGAAATTTTTCATGAAAAGCATAGATACTCCCAATTCATGCATAAACAGTCATAGTCCAATCAATTCAAAAAACAATCATAAAGACCAACAACTTACAAGAAAACCTAACTCGAATTTGAGAATTTCCACTTTTCAATAATGGATGTTAGGGTATCTATGTATGCAAGGATTACATGGATGAATAAAACTATCATACCTTTCTATCAAATACCACAAAAAATTGGAGAATGGATACTTGAACCTTAAGCCCTAGCATGAAC…
3	TomSatX7-1	Polymorphic	(TAT)12	TCACGACTAGTTTGGTTTGCA	AAATGCCACATAAATTGAGACAAAAA	501-536	GTAAATTTTTAAATTTTAAAAAGCCCAACTAAGCAGGCCCATTAAAAAAACCGAAATAACAAAACCGAATCAAAATAATATAAATTGAACCGAAATAATAAAAACCGAATTGAACTGTATTATTTTGGTTCGATGGTCGGTACACGTTGTACAAGAACCGAAAACCAAAAAATCGAAAAGAATCAAAACCGAATCGAATTACCGAATGCCCACCTTCCTTCTGAATTTTATTTTTGAAAGATTTAAACAGTAAGTCTTGAAAGAAATTATGTTTGAATAATTGTAGATTCTTTTATTTTATTTTTTAAAAAAAATATTCCATAGACAAAAAGAAATAGACATGTAACAAACTATGACATTGAGAATTAAATAAACCGAAAAAAATATTTGTTCACCTAC…
4	TomSatX7-2	Polymorphic	(TG)14	TGCTCAACAATCCATCTTCCGA	CCTTTAAATGTAGCGGCGCG	451-478	ATGATTTGAATGAAATTGGTGTGTGGGTGAAGTAACCCAACACAAAAATAGCCCACATACCTAGTTGGGGATCACCCCAATGAAAATCCACGAATCTAAACTTGGTGTTCTTGCGTCTTCTTCTTCCTTCTCCTCTTTTCTTATTGCTTTCAAAATCCTAGTCTATTTTTCTAAGTGTGTGAACTGAATGGGATCACTTTTTACACCAACATATTACTCCAAAAAGAAATAAGTTGGCTTAAGGAAAAGACCAAAACACCCTTACTAAATCCAGTTTTGGAACTTTCTCTGCTCAACAATCCATCTTCCGAATGTCATGTATCACTCATACGACCTCGGAAATTCACAAACTTAGTGTCGTTGGAACAAGGTCAATGCAACAATTGAAAAGTCATAAGA…
5	TomSatX8-1	Polymorphic	(AGA)18	ACACCTAAACTGAATTGGGCTG	CTCCACTGTTTCCCGCAGAT	501-554	CAAGTAATACCAAACATAAAATATTTAATTGCATATATAAATAAGTATAACCAAAATCTCAATAGCAACAACATATTAGCAAATATTTCAATTCAAAAACTAAATATAGATAGTAGATGCAAAAGTTTTGAACCTGAATGACTCAATAGTCAATAAGATAAGCGATAGTATAAGTCTAATCTTCTTTAAGATTTTCGAATCTTTAAGTCCAAGATTCTCTGCATTATATTGTTTCTCATCTTCGTCCTCTATACTATAATTCAAACCTATGTCTTTCTTTTTGTTCACTCCTTTTTTCTACCATCAGCTAATGGCATTGAATATTACTATTTGTAGGCAAAAAAATTAAATGTATTAATTATTATACACCTAAACTGAATTGGGCTGAAGATTAAAATG…
6	TomSatX9-2a	Polymorphic	(GA)11	TCGACGGGGTTTGGAGTTTC	TTCCTCAAACGACCCACACC	501-522	AGAAGTATTTTCGACTTTTAGGAGTCGCCACTTAATTTTTAAGAAAAATTAAGAAAACTCATTCTCAAAACAATTTAAACAGAAAAAATCATTTTGAAAATATTTTAGGGGGTTCGGGATTCTTATTAGTGTCTTAGGAAGGTGAAAGGCACCTAAGACACTCCGCTAACTTACGGTTTTCCAACGATTAACTTATTTGACTATTTTGTTTTAACTTTTGCGAATCTTTTGTTATTAAACTTATTAGACATTTACTTAGGCAAATTTTCAAGGTTGGAAATATTCATAGTTTATTTTGCAACTTTTGTGAAGTTATTCCGAAACTCAATTTCCTTGAAGTTTTATCTAAACAAACTTTATGAATTTTGAAATATTATCGCTTCTAAGCTTGATTTTAAA…
7	TomSatX9-2b	Polymorphic	(GA)6	GAAGCTATTCCGAAACTCAAC	CGCAGAACAAACAGAACCCA	501-516	AGAAGTATTTTCGACTTTTAGGAGTCGCCACTTAATTTTTAAGAAAAATTAAGAAAACTCATTCTCAAAACAATTTAAACAGAAAAAATCGTTTTGAAAATATTTTAGGGGGTTCGGGATTCTTATTAGTGTCTTAGGAAGGTGTAAGGCACCTAAGACACTCCGCTAACTTACGGTTTTCCAACGATTAACTTATTTGACTATTTTATTTTAACTTTTGCGAATCTTTTGTTATTAAACTTATTAGACATTTACTTAGGCAAATTTTCAAGGTTGGAAATATTCATAGTTTATTTTGCAACTTTTGTGAAGCTATTCCGAAACTCAACTTCCTTGAATTTTTATCTAAACAAACTTTATGAATTTTGAAATATTATCGCTTCTAAGCTTGATTTTAAA…
8	TomSatX11-1	Polymorphic	(TAT)18	TGAGTGGTGGGTGAATAGGGA	AATGCTGTCTGGCTCATTGT	501-554	GCCCCGTAGCATCTCGAGTGTATTAGATACAAACGAAGGAGGTACTTCAAAAACATAGAGTTGATTTATATTCATACTAGTTTGAATTTTTCGATTTCCTTCTATACTCTGCTGAGTGAGTCGATTTCATTCGTAATTGCTTAATATTATTTCTTTATCATAGGACGATTATATCTATTTATTTAATTTTATATAAATTTATAAGTGTATTTATTTATATCTAAAAATTAAAGGACATAAATACTGAAGTACGCATTATTATGCTTAAAAGATAATAGTATTTTATATAAATTTATAAGTGTATTTATTTATATCTAAAAATTAAAGGACATAAATACTGAAGTACGCATTATTATGCTTAAAAGATAATAGTATGATAGTTTTACACATTTATAAATT…
Note: Chromsome position is for Solanum Lycopersicum cultivar Heinz 1706, SL3.0
