# Supplementary figures and images for: Simple Sequence Repeat Markers Reveal Genetic Diversity and Population Structure of Bolivian Wild and Cultivated Tomatoes (Solanum lycopersicum L.)
Source: MDPI journal article supplement (doi:10.3390/genes13091505), 2022-08-23

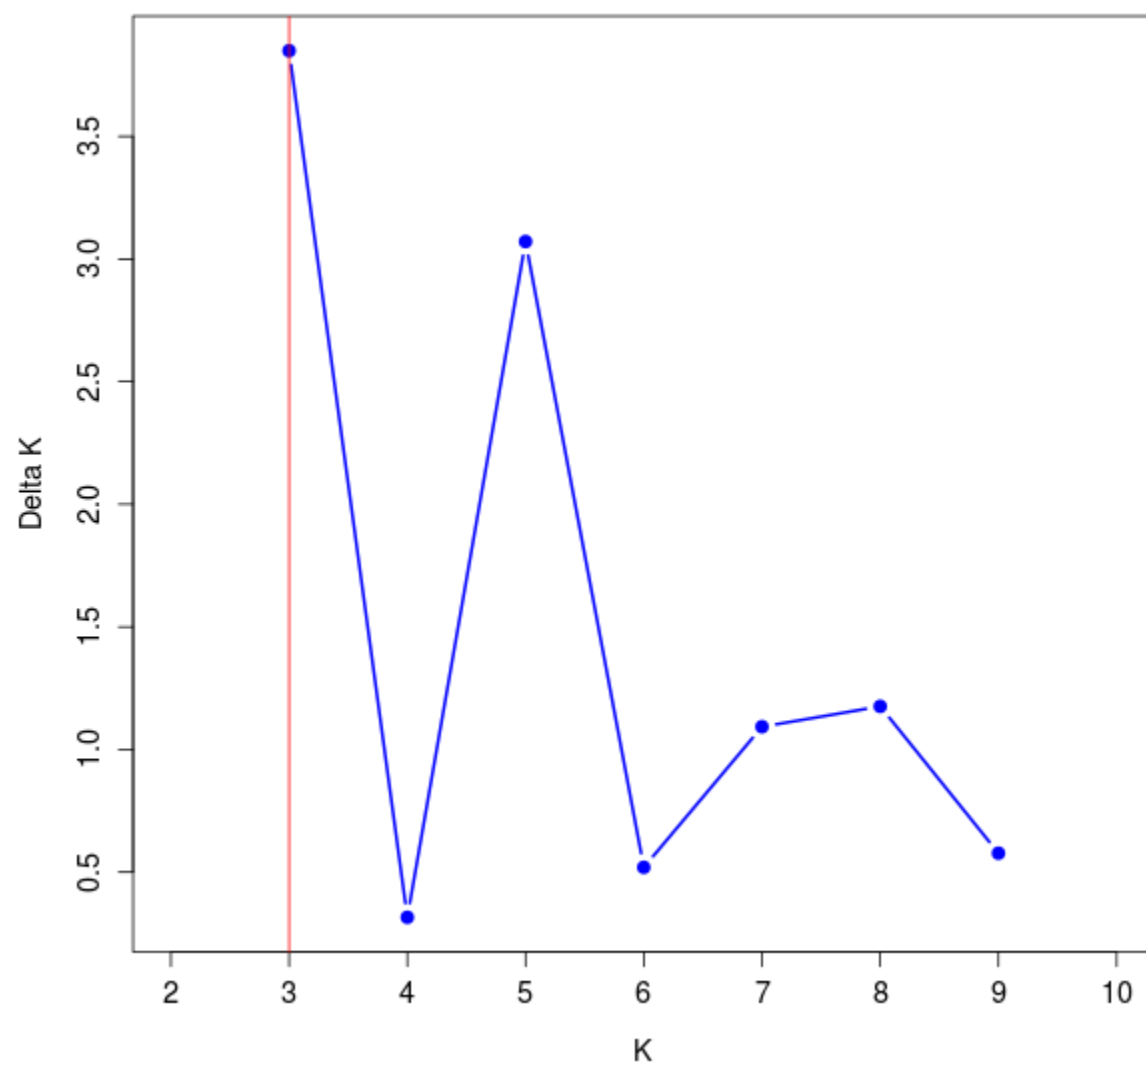

**Figure S1.** Delta-K plot with a maximum value at 3 ( $\Delta K=3$ ).

Supplement: s1 [file s1]
